# Supplementary material for: Validation and Predictive Utility of a Person-Centered Quality of Contraceptive Counseling (QCC-10) Scale in Sub-Saharan Africa: A Multicountry Study of Family Planning Clients and a New Indicator for Measuring High-Quality, Rights-Based Care
Source: PubMed Central journal article supplement (PMC11152181; doi:10.1111/sifp.12229), 2023-02-14
Supplement: NIHMS1991485-supplement-Supplementary_Tables.pdf [file NIHMS1991485-supplement-Supplementary_Tables.pdf]

**APPENDIX TABLE T1 Number of baseline clients, eligible clients for follow-up, and clients who completed phone follow-up interview**

|                                                                  | Burkina Faso | Kenya        | Kano, Nigeria | Lagos, Nigeria |
|------------------------------------------------------------------|--------------|--------------|---------------|----------------|
| Number of clients at baseline                                    | 911          | 4115         | 695           | 509            |
| % of baseline clients who received:                              |              |              |               |                |
| Contraceptive methods                                            | 61.8         | 89.7         | 94.2          | 89.2           |
| Prescription for contraceptive methods                           | 25.8         | 5.0          | 1.2           | 0.0            |
| Neither                                                          | 12.4         | 5.3          | 4.6           | 10.8           |
| Eligible for follow up                                           | 87.6         | 94.7         | 95.4          | 89.2           |
| Number of clients eligible for phone follow up                   | 798          | 3898         | 663           | 454            |
| % of eligible clients who:                                       |              |              |               |                |
| Were willing to participate in the follow up                     | 97.2         | 98.4         | 93.5          | 96.3           |
| + Had access to a phone                                          | 87.6         | 94.1         | 77.2          | 90.5           |
| + Were contacted successfully                                    | 78.3         | 85.1         | 72.2          | 78.4           |
| + Consented for the interview                                    | 77.6         | 85.1         | 72.2          | 77.5           |
| + Completed the interview                                        | 77.6         | 85.0         | 72.2          | 77.3           |
| <b>Number of clients who completed phone follow-up interview</b> | <b>619</b>   | <b>3,313</b> | <b>481</b>    | <b>351</b>     |

**APPENDIX FIGURE A1 Follow-up interview questions to determine outcome variables**

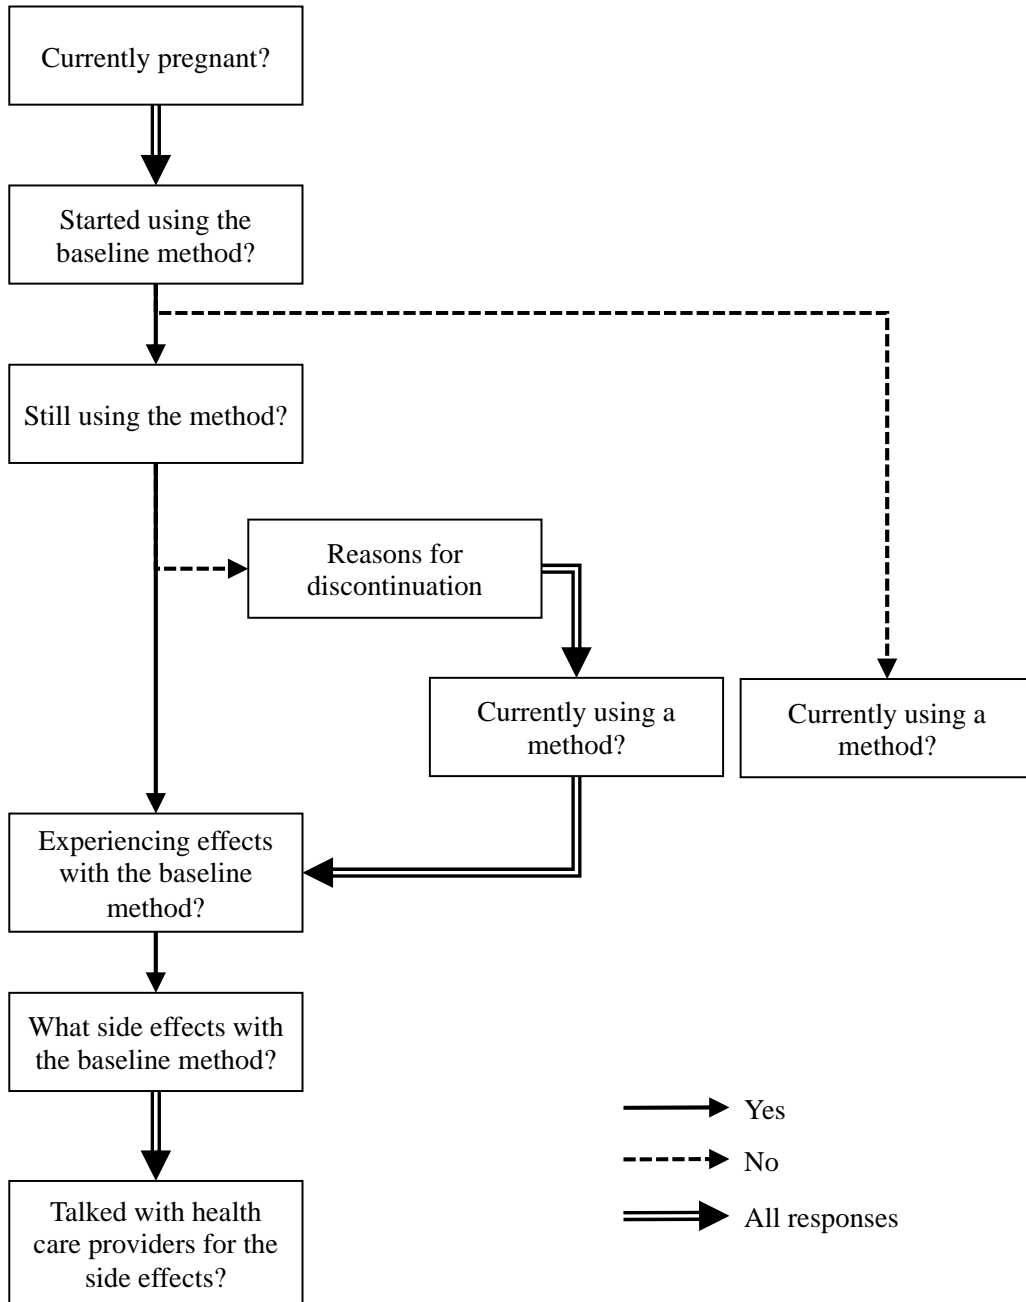

**APPENDIX Table T2** Among women who received a prescription or method at baseline, adjusted associations between women’s baseline quality item scores and reproductive outcomes at follow-up, by geography—results from multivariable regression models

|                                                                | Burkina Faso<br>(n=597)  | Kenya<br>(n=3,270)          | Kano, Nigeria<br>(n=479)    | Lagos, Nigeria<br>(n=346) |
|----------------------------------------------------------------|--------------------------|-----------------------------|-----------------------------|---------------------------|
| <b>Model and Reproductive Outcome</b>                          |                          |                             |                             |                           |
| <b>Model 1: Continued protection from unintended pregnancy</b> | <b>aOR (95% CI)</b>      |                             |                             |                           |
| Informational and interpersonal items only                     | 1.25<br>(0.63 – 2.49)    | 1.12<br>(0.75 – 1.67)       | 2.00<br>(0.66 – 6.09)       | 1.45<br>(0.41 – 5.14)     |
| Disrespect and abuse items only                                | 1.19<br>(0.58 – 2.43)    | 0.88<br>(0.622 – 1.24)      | 0.93<br>(0.53 – 1.65)       | 0.75<br>(0.25 – 2.19)     |
| <b>Model 2: Informational needs met</b>                        | <b>aβ (95% CI)</b>       |                             |                             |                           |
| Informational and interpersonal items only                     | 0.92***<br>(0.55 – 1.29) | 1.09***<br>(0.88 – 1.30)    | -0.28<br>(-1.09 – 0.54)     | -0.45<br>(-1.19 – 0.28)   |
| Disrespect and abuse items only                                | 0.01<br>(-0.38 – 0.38)   | -0.25***<br>(-0.42 - -0.07) | -0.63***<br>(-1.04 - -0.21) | 0.48<br>(-0.13 – 1.08)    |
| <b>Model 3: Care-seeking for side effects<sup>^</sup></b>      | <b>aOR (95% CI)</b>      |                             |                             |                           |
| Informational and interpersonal items only                     | 1.21<br>(0.76 - 1.94)    | 1.35**<br>(1.06 - 1.71)     | 2.36<br>(0.95 – 5.85)       | 0.85<br>(0.38 - 1.90)     |
| Disrespect and abuse items only                                | 0.78<br>(0.48 – 1.26)    | 0.95<br>(0.78 – 1.16)       | 0.98<br>(0.63 – 1.52)       | 1.02<br>(0.55 – 1.90)     |

Informational exchange and interpersonal items only (8 items); disrespect and abuse items only (2 items). Models adjusted for age, educational attainment, marital status, prior contraceptive method use. Marital status not included in Nigeria, due to small variation. Ref=reference group. aOR=adjusted odds ratio. aβ=adjusted linear regression coefficient. \*\*\* p<0.01, \*\* p<0.05, \* p<0.1. Estimates adjusted for lost-to-follow-up analytical weights. <sup>^</sup>Analyses restricted to women who with any side effects of their baseline method.
